# Supplementary material for: Impact of improved Sea Surface Temperature representation on theforecast of small Mediterranean catchments hydrological response toheavy precipitation
Source: Copernicus journal article supplement (doi:10.5194/hess-2019-345), 2019-07-16
Supplement: Supplementary file 1 [file hess-2019-345-supplement.pdf]

## *Supplement*

The following Figures S1 and S2 show, for both case studies 1 and 2 and for all simulations carried out, the skin SST fields  
5 in the Domain D02 with time steps of 6 and 24 hours (for case study 1 and 2, respectively).

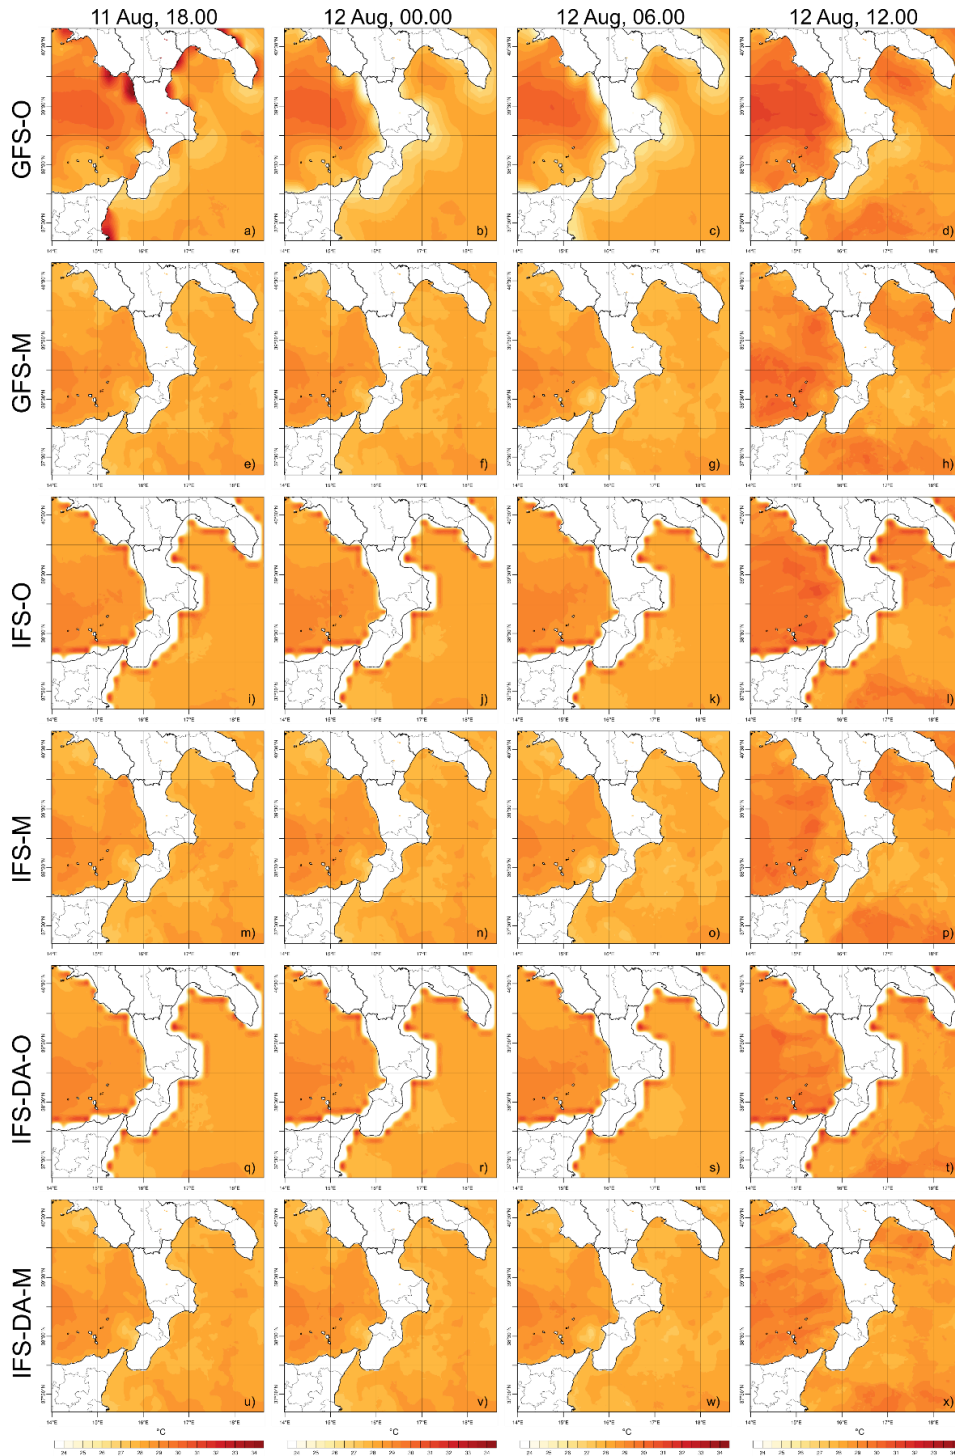

**Fig. S1: Case study 1: maps of SSTSK (°C) in the domain D02, for the six simulations listed in Table 2, from 18 UTC 11 August 2015 to 18 UTC 12 August 2015, every 6 hours.**

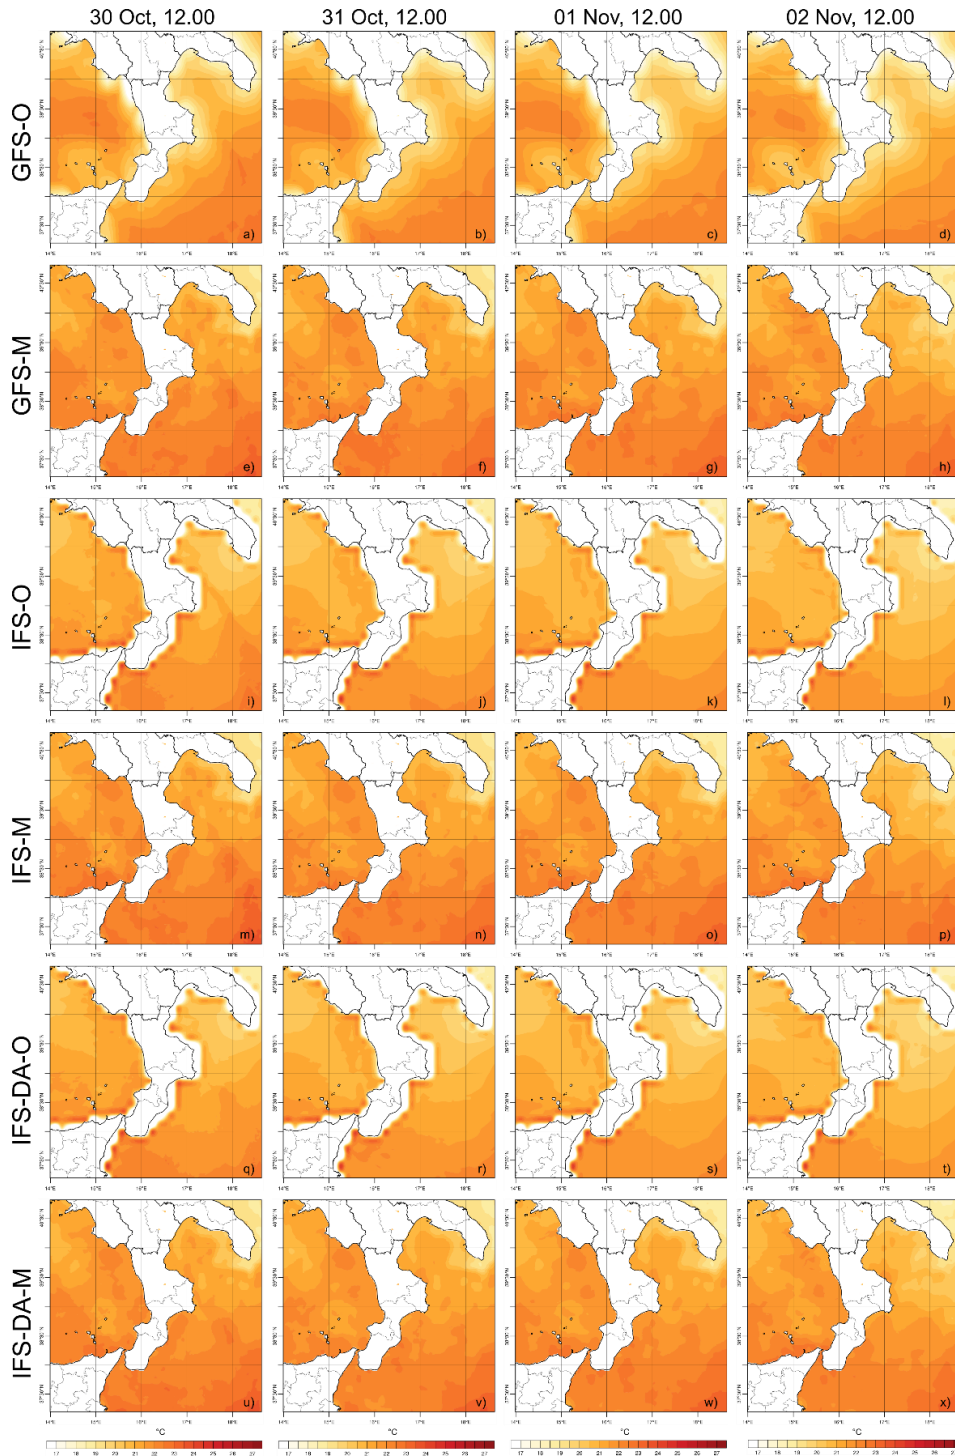

**Fig. S2: Case study 2: maps of SSTSK ( $^{\circ}\text{C}$ ) in the domain D02, for the six simulations listed in Table 2, from 12 UTC 30 October 2015 to 12 UTC 02 November 2015, every 24 hours.**
